# Supplementary material
Source: PubMed Central journal article supplement (PMC5752584)
Supplement: NIHMS918083-supplement-1.pdf [file NIHMS918083-supplement-1.pdf]

## Supplementary Information

### **Pharmacologic inhibition of the menin-MLL interaction leads to transcriptional repression of *PEG10* and blocks hepatocellular carcinoma**

Katarzyna Kempinska<sup>1,3</sup>, Bhavna Malik<sup>1,3</sup>, Dmitry Borkin<sup>1</sup>, Szymon Klossowski<sup>1</sup>, Shirish Shukla<sup>1</sup>, Hongzhi Miao<sup>1</sup>, Jingya Wang<sup>1,2</sup>, Tomasz Cierpicki<sup>1,\*</sup>, Jolanta Grembecka<sup>1,\*</sup>

<sup>1</sup> Department of Pathology, University of Michigan, Ann Arbor, MI, 48109

<sup>2</sup> Current address: Medimmune, LLS, Gaithersburg, Maryland, MD, 20878

<sup>3</sup> These authors contributed equally to this work

\*Corresponding authors:

Jolanta Grembecka, PhD

Associate Professor, Department of Pathology, University of Michigan

1150 West Medical Center Dr, MSRB I, Room 4510D

Ann Arbor, MI, 48108

e-mail: jolantag@umich.edu

Tel. 734-615-9319

Tomasz Cierpicki, PhD

Associate Professor, Department of Pathology, University of Michigan

1150 West Medical Center Dr, MSRB I, Room 4510C

Ann Arbor, MI, 48108

e-mail: tomaszc@umich.edu

Tel. 734-615-9324

## Supplementary Figures

### Supplementary Figure 1. Expression of menin, *MLL1* and *MLL2* in HCC cell lines. **A.**

Detection of menin expression in HCC cells by Western Blot analysis. Whole cell lysate from various HCC cell lines were immunoprecipitated against menin antibody (Bethyl). **B.**

Quantitative RT-PCR analysis of *MLL1* and *MLL2* expression performed in a panel of HCC cell lines. Expression of *MLL1* and *MLL2* was normalized relative to GAPDH expression. qRT-PCR was performed using SYBR Green primers for *MLL1* and *MLL2* (see **Supplementary Methods** for sequences). **C.** Chemical structures and activity of MI-503 and MI-372 (negative control

compound) for inhibition of the menin-MLL interaction ( $IC_{50}$  values were reported before by Borkin et al <sup>1</sup>). **D.** Results from the MTT cell viability assay after 7 days of treatment of HCC cell lines with MI-372 (negative control compound;  $GI_{50} > 12 \mu M$  in all cell lines). Data

represents mean of quadruplicates  $\pm$  SD. **E.** Uncropped scans of western blot for the Cellular Thermal Shift Assay (CETSA) performed in HepG2 cells. Molecular weight ladder is shown. Red boxes indicate the fragments of SDS-PAGE gel that is presented in Fig. 1E.

**A**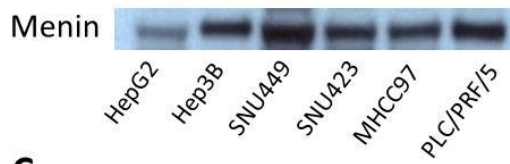**B**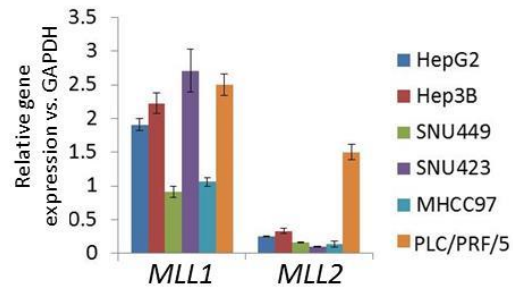**C**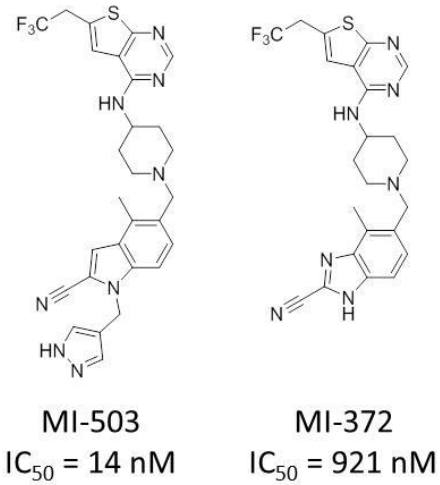**D**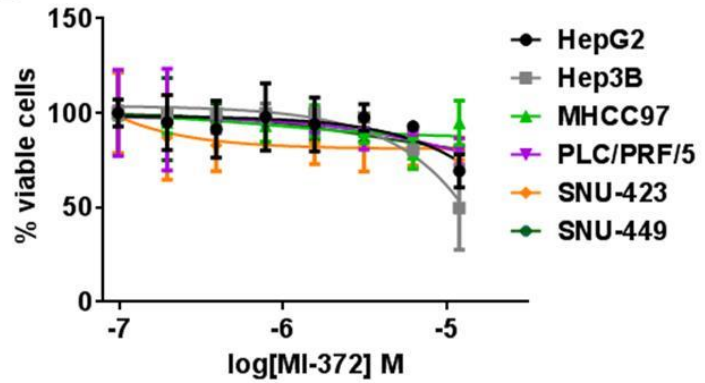**E**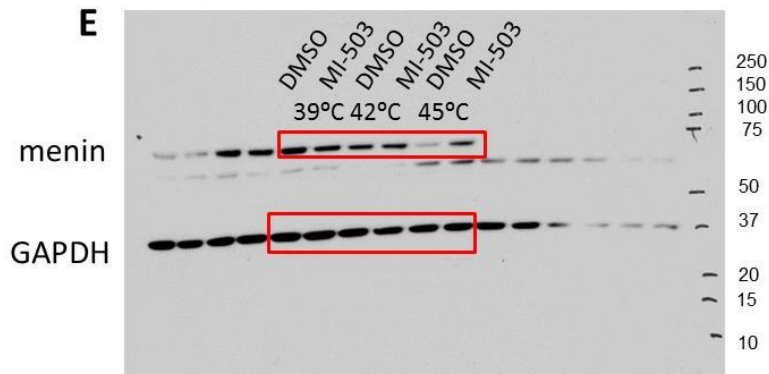

**Supplementary Figure 2. MI-503 affects cell migration in HCC cell lines. A, B.** Pictures demonstrating cell migration in HepG2 (A) or Hep3B (B) cells upon treatment with various concentrations of MI-503 or DMSO.

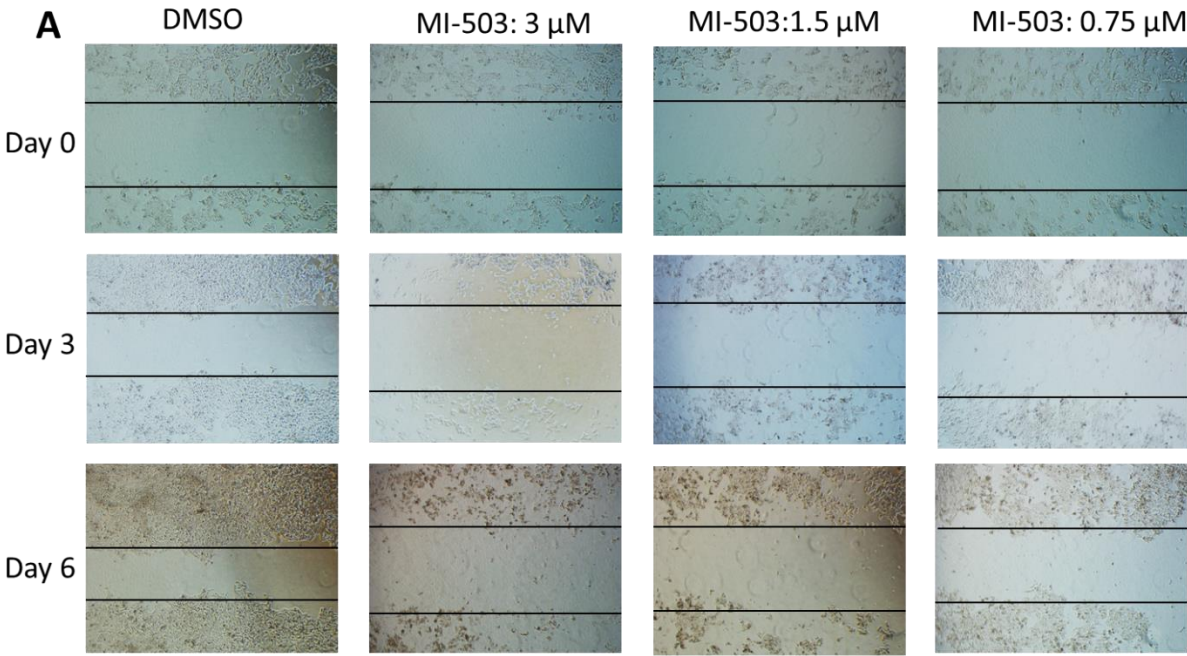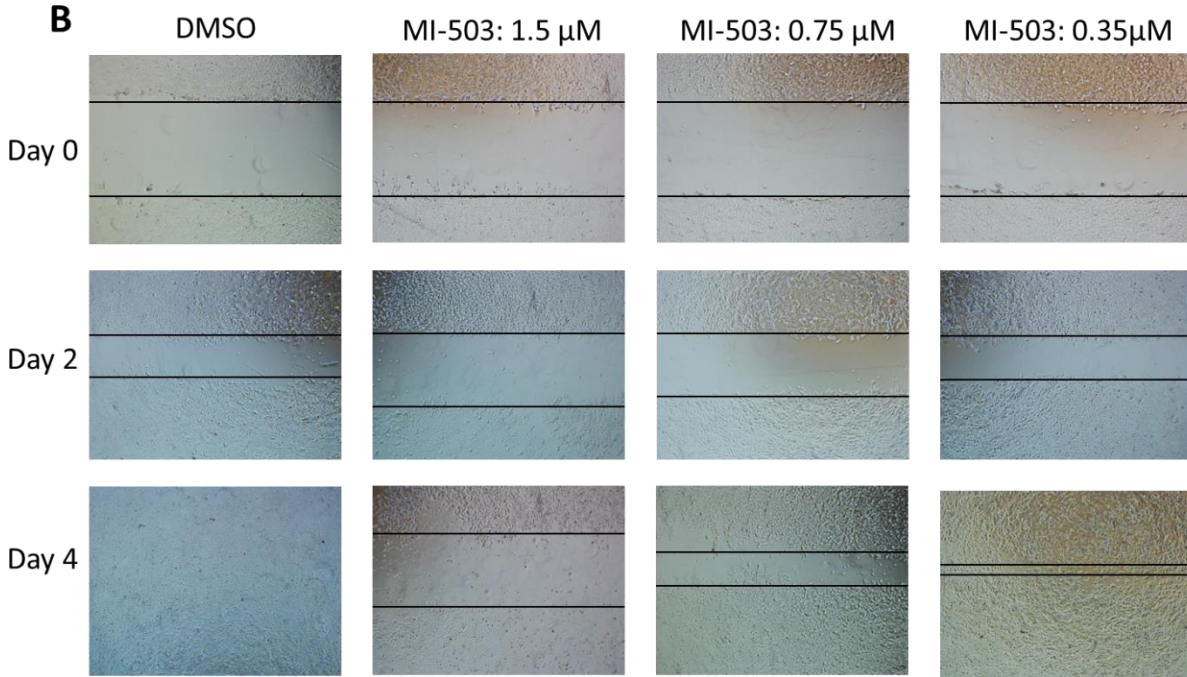

**Supplementary Figure 3. MI-503 does not induce toxicity in mice. A, B.** Body weight of mice treated with vehicle, MI-503, sorafenib and combination of both compounds in HepG2 (A) and Hep3B (B) xenograft models. n = 8-9 mice per group. C. Level of liver enzymes: AST (aspartate aminotransferase) and ALT (alanine transaminase) as well as ALB (albumin) in mice blood plasma upon treatment with vehicle, MI-503, sorafenib or combination of both agents in the blood samples isolated from HepG2 xenograft mice. n = 5 mice per group.

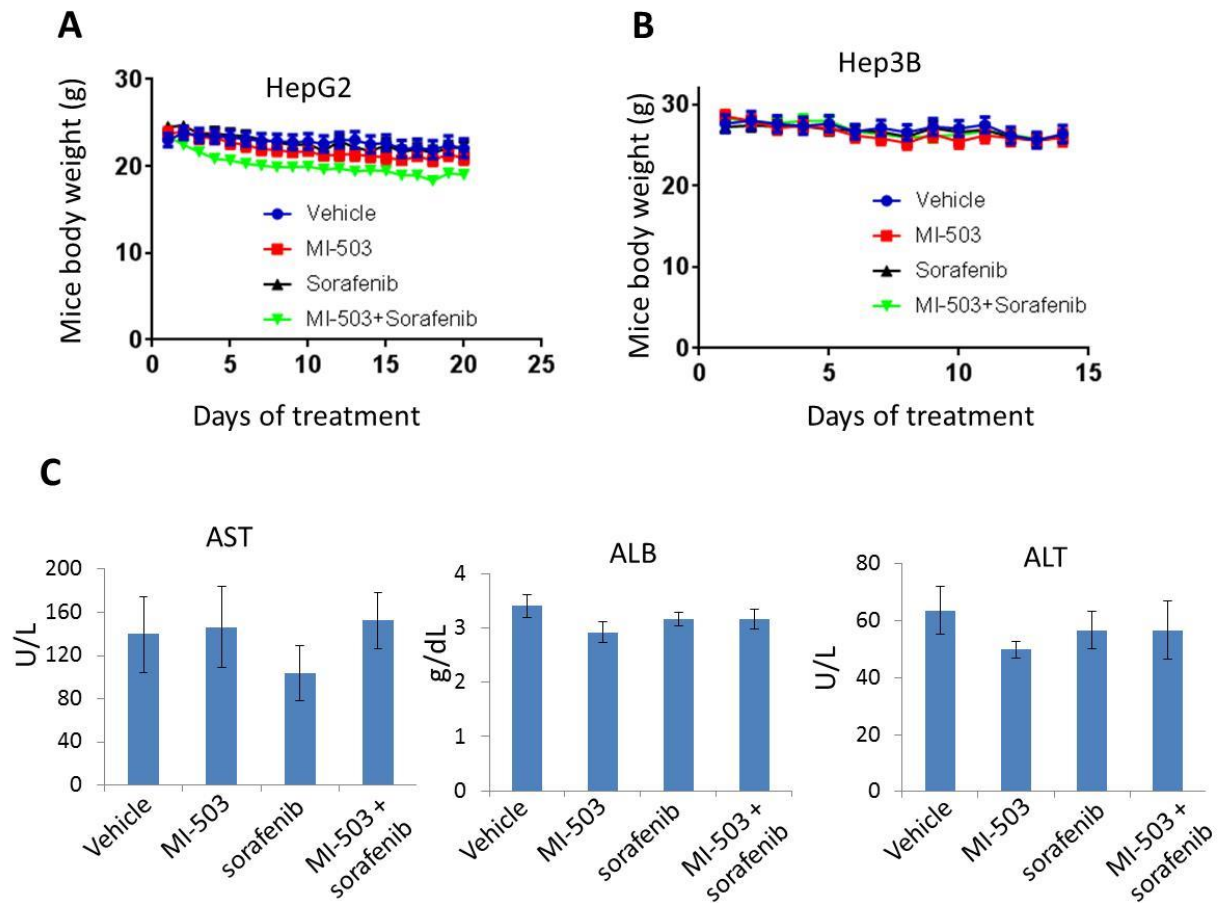

**Supplementary Table 1. Inhibition of cell viability in HCC cell lines by menin-MLL inhibitors.** GI<sub>50</sub> values measured in the MTT cell viability assay after 7 or 12 days of treatment of the HCC cell lines or normal adipose-derived mesenchymal stem cells (ASC52, control cell line) with MI-503 or MI-372 are provided. ND – not determined.

| <b>Cell line</b> | <b>MI-503<br/>7d (μM)</b> | <b>MI-503<br/>12d (μM)</b> | <b>MI-372<br/>7d (μM)</b> | <b>MI-372<br/>12d (μM)</b> |
|------------------|---------------------------|----------------------------|---------------------------|----------------------------|
| <b>HepG2</b>     | <b>3.1</b>                | <b>1.2</b>                 | <b>&gt; 12</b>            | <b>ND</b>                  |
| <b>Hep3B</b>     | <b>1.3</b>                | <b>0.56</b>                | <b>12</b>                 | <b>ND</b>                  |
| <b>SNU-423</b>   | <b>6.5</b>                | <b>0.68</b>                | <b>&gt;12</b>             | <b>&gt;12</b>              |
| <b>MHCC97</b>    | <b>1.4</b>                | <b>1.1</b>                 | <b>&gt;12</b>             | <b>ND</b>                  |
| <b>SNU-449</b>   | <b>3.1</b>                | <b>2.4</b>                 | <b>&gt;12</b>             | <b>&gt;12</b>              |
| <b>PLC/PRF/5</b> | <b>4.1</b>                | <b>3.2</b>                 | <b>&gt;12</b>             | <b>&gt;12</b>              |
| <b>ASC52</b>     | <b>&gt;6</b>              | <b>&gt;6</b>               | <b>ND</b>                 | <b>ND</b>                  |

**Supplementary Table 2. RNAseq data from MI-503 treatment in HepG2 cells.** Results from global gene expression studies obtained from the RNAseq experiment performed in HepG2 cells upon 6 days of treatment with 3  $\mu$ M MI-503 or DMSO. Supplementary Table 2 is provided as a separate Excel file.

**Supplementary Table 3. Mutation status of *CTNNB1* in human HCC cell lines.** Mutations or deletions in *CTNNB1* gene were found in HepG2 and SNU-449 cell lines. Other HCC cell lines harbor wild type *CTNNB1*.

| <b>Cell line</b> | <b><i>CTNNB1</i> mutation status</b>                   |
|------------------|--------------------------------------------------------|
| HepG2            | deletion in exon-3 in <i>CTNNB1</i> <sup>2</sup>       |
| Hep3B            | wild type <i>CTNNB</i> <sup>3</sup>                    |
| SNU-423          | wild type <i>CTNNB</i> <sup>4</sup>                    |
| SNU-449          | point mutation in exon-3 of <i>CTNNB1</i> <sup>2</sup> |
| PLC/PRF/5        | wild type <i>CTNNB</i> <sup>5</sup>                    |



## Supplementary Methods

**Treatment with chemical compounds:** Doses of compounds used in the cell-based studies were adjusted based on: (i) sensitivity of a specific cell line to these compounds; (ii) time course of the experiments; (iii) type of the experiment (e.g. to obtain sufficient amount of the material for analysis, if applicable).

**Cell viability assay:** Cells were plated in 24-well plates at a concentration of  $3 \times 10^4$  cells/ml and treated with the compounds or 0.25% DMSO followed by incubation at 37°C for 7, 8 or 12 days. After 3 days of treatment cells in all wells were trypsinized and the DMSO treated cells were counted. The cell number was then adjusted to the original concentration in the DMSO treated samples and the same dilution factor was used to adjust cell number in the MI-503 treated cells. Compounds were re-supplied each time during media change. The same procedure was repeated at day 7 (or 8) for 12 days experiments. Before read-out, 100  $\mu$ l of cell suspensions were transferred to the 96-well plates for each sample in quadruplicates. The MTT cell proliferation assay kit (Roche) was then applied. Plates were read for absorbance at 570 nm using a PHERAstar BMG microplate reader. The experiments were performed two to three times in quadruplicate with calculation of mean and standard deviation for each condition.

**CETSA assay:** Briefly,  $5 \times 10^6$  HepG2 cells in EMEM medium with 10% FBS and 1% Pen Strep were seeded in T-25 cell culture flasks (BD Biosciences, San Jose, CA, USA) in appropriate volume and incubated overnight (37°C, 5% CO<sub>2</sub>). On the following morning cells were exposed with either DMSO or 2  $\mu$ M MI-503 for 3 hours at 37°C, 5% CO<sub>2</sub>. Following the incubation the cells were harvested and washed with PBS. Cells were resuspended in PBS and equal amounts of cell suspensions were aliquoted into a 0.2 mL tubes. These 0.2 mL tubes were heated individually at different temperatures for 3 min followed by cooling for 3 min at room

temperature. Cells were lysed by addition of the lysis buffer (30  $\mu$ L) and using 3 cycles of the freeze-thawing with liquid nitrogen. The lysates were centrifuged at 20,000 x g for 20 minutes at 4°C and supernatants were transferred to new tubes and analyzed by the SDS-PAGE followed by western blot analysis of menin using the anti-menin antibody (Bethyl) and GAPDH (Cell Signaling Technology) used as a loading control.

**Real-time qPCR:** Cells were plated at a concentration of  $0.25 \times 10^6$  cells/ml in the 12-well plate in duplicates and treated with MI-503 or DMSO for 6 and/or 13 days. After 3 days of treatment cells in all wells were trypsinized and the DMSO treated cells were counted. The cell number was then adjusted to the original concentration ( $0.25 \times 10^6$  cells/ml) in all samples. Media was changed and compound was re-supplied at that time. For the experiment with 13 days of treatment, media change was also performed at day 10 using the same procedure. 1  $\mu$ g RNA was then reverse transcribed to cDNA using HICAP RT kit from Applied Biosystems. Following cDNA synthesis, quantitative PCR was performed using SYBR Green Supermix with ROX (BioRad) using the primers for *YAP1*, *PEG10*, *SLC38A4*, *SEMA3C* and *GDF15* (see Supplementary Info for primer sequences). Similarly, RNA was isolated from the tumor tissues and cDNA was prepared and analyzed for expression of target genes. For the detection of MLL1 and MLL2, cells ( $0.25 \times 10^6$  cells/ml) were harvested from the HCC cell lines. RNA was isolated and reverse transcribed into cDNA. qPCR was performed using SYBR Green *MLL1* and *MLL2* primers (see Supplementary Information for primer sequences).

**Sphere formation assay.** HepG2 or Hep3B cells were plated at a density of 500 cells in 24-well ultra-low attachment plates (Corning) in X-VIVO 20 medium (Lonza) supplemented with 5  $\mu$ g/mL insulin (Sigma-Aldrich) and 20 ng/mL human recombinant epidermal growth factor (Invitrogen).

Cells were treated with MI-503 or DMSO and incubated at 37 °C with 5 % CO<sub>2</sub> for 2 weeks. The number of spheres with a diameter larger than 50 µm was counted after 2 weeks.

**Cell migration assay.** To analyze the wound healing capacity, we used an *in vitro* model of wound healing (CytoSelect™ 24-Well Wound Healing Assay) from Cell Biolabs (BIOCAT GmbH, Heidelberg, Germany). The CytoSelect™ 24-well Wound Healing Assay Kit consists of 2 × 24-well plates each containing 12 proprietary treated plastic inserts. The inserts create a wound field with a defined gap of 0.9 mm for measuring the migration and proliferation rate of cells. Hep3B and HepG2 cells suspension containing  $1 \times 10^5$  cell/mL in Eagles minimum essential medium (EMEM) with 10% fetal bovine serum (FBS) and 1% penicillin/streptomycin (Pen Strep, Gibco) antibiotics were prepared. For optimal cell dispersion, 250 µL of cell suspension was added on each side of the insert by carefully inserting the pipette tip through the open end of the insert ( $0.5 \times 10^5$ /well/500 µl). Cells were cultured until they formed a monolayer around the insert (48 h). Then, the inserts were removed from the wells, leaving a precise 0.9 mm open “wound field” between the cells. To assess how the “wound field” is affected by the cells itself, the wells were washed twice with PBS and then filled with 500 µL of prepared medium with compound or DMSO. To analyze migration capacity the first photographs of the wounded area were taken at days 0, 2 and 4 for Hep3B and after 3 and 6 days for HepG2 cells. Surface wound area was then set on the photographs and cell free region was measured at all time points.

**Menin expression:** The whole cell lysate was prepared from all the HCC cell lines (3-4 mln cells per cell line) and run onto the SDS-PAGE gel. Menin protein expression was detected using the anti-Menin antibody (Bethyl).

**Primers for qRT-PCR (SYBR Green):**

**MLL1**

Forward: GTGCTTTGTGGTCAGCGGAAGT

Reverse: TGTGAGACAGCAACCCACGGTG

**MLL2**

Forward: AGAATCTGCGTTCGGCTGGTTC

Reverse: TCTGGTTCCTGCTGTCTCCACT

**SLC38A4**

Forward: TGTATGCCACCCTGAGGTCCTT

Reverse: GCAGGTACATGACAAGCATCCC

**GDF15:**

Forward: CAACCAGAGCTGGGAAGATTTCG

Reverse: CCCGAGAGATACGCAGGTGCA

**SEMA3C:**

Forward: ACCCACTGACTCAATGCAGAGG

Reverse: CAGCCACTTGATAGATGCCTGC

**PEG10:**

Forward: ACCACCAGGTAGATCCAACCGA

Reverse: TGTCAGCGTAGTGACCTCCTGT

**GAPDH**

Forward: GTCTCCTCTGACTTCAACAGCG

Reverse: ACCACCCTGTTGCTGTAGCCAA

## **Primers for Chromatin Immunoprecipitation**

| <b><u>Primers for PEG10 Promoter and Downstream Regions</u></b> | <b><u>Genomic coordinates</u></b> |
|-----------------------------------------------------------------|-----------------------------------|
| PEG10 P-A forward: 5'-CAACAGATTGTCAGTTTCCCAAGC-3'               | chr7:94,654,908-94,654,931        |
| PEG10 P-A reverse: 5'-CGATTACGAGGTTTACACAGAGACC-3'              | chr7:94,655,191-94,655,215        |
| PEG10 P-B forward: 5'-CTCTGTTTTCTTGGAGCAGGACC-3'                | chr7:94,657,370-94,657,392        |
| PEG10 P-B reverse: 5'-ACCACAACACTACACCGCCACTTC-3'               | chr7:94,657,617-94,657,638        |
| PEG10 P-C forward: 5'-CTCCCTAAGCCTGCCTCTGC-3'                   | chr7:94,658,482-94,658,501        |
| PEG10 P-C reverse: 5'-GGGCTCAGGCAAGGAAGGTG-3'                   | chr7:94,658,603-94,658,622        |
| PEG10 P-D forward: 5'-TAACTTGTGCTGCCTCAGTCGC-3'                 | chr7:94,660,520-94,660,541        |
| PEG10 P-D reverse: 5'-CCTGCCACCAGACATTTTCATTC-3'                | chr7:94,660,783-94,660,804        |

## Supplementary References

(1) Borkin, D.; He, S.; Miao, H.; Kempinska, K.; Pollock, J.; Chase, J.; Purohit, T.; Malik, B.; Zhao, T.; Wang, J.; Wen, B.; Zong, H.; Jones, M.; Danet-Desnoyers, G.; Guzman, M. L.; Talpaz, M.; Bixby, D. L.; Sun, D.; Hess, J. L.; Muntean, A. G.; Maillard, I.; Cierpicki, T.; Grembecka, J. Pharmacologic inhibition of the Menin-MLL interaction blocks progression of MLL leukemia in vivo. *Cancer Cell* **2015**, *27*, 589-602.

(2) Delgado, E.; Bahal, R.; Yang, J.; Lee, J. M.; Ly, D. H.; Monga, S. P. beta-Catenin knockdown in liver tumor cells by a cell permeable gamma guanidine-based peptide nucleic acid. *Curr Cancer Drug Targets* **2013**, *13*, 867-878.

(3) Ding, X.; Yang, Y.; Han, B.; Du, C.; Xu, N.; Huang, H.; Cai, T.; Zhang, A.; Han, Z. G.; Zhou, W.; Chen, L. Transcriptomic characterization of hepatocellular carcinoma with CTNNB1 mutation. *PLoS One* **2014**, *9*, e95307.

(4) Cagatay, T.; Ozturk, M. P53 mutation as a source of aberrant beta-catenin accumulation in cancer cells. *Oncogene* **2002**, *21*, 7971-7980.

(5) de La Coste, A.; Romagnolo, B.; Billuart, P.; Renard, C. A.; Buendia, M. A.; Soubrane, O.; Fabre, M.; Chelly, J.; Beldjord, C.; Kahn, A.; Perret, C. Somatic mutations of the beta-catenin gene are frequent in mouse and human hepatocellular carcinomas. *Proc Natl Acad Sci U S A* **1998**, *95*, 8847-8851.
